# Supplementary material
Source: PubMed Central journal article supplement (PMC7060836)

## SUPPLEMENTAL TABLES

**Supplemental Table 1.** Baseline Characteristics of the Development Cohort <sup>a</sup>

| Variable                                  | Patients                  |                             |                                     | P Value |
|-------------------------------------------|---------------------------|-----------------------------|-------------------------------------|---------|
|                                           | All Patients<br>(N=3,816) | Without<br>AKI<br>(n=3,423) | Patients With<br>Any AKI<br>(n=393) |         |
| <b>Demographics</b>                       |                           |                             |                                     |         |
| Age, y                                    | 68<br>(53.0-81.1)         | 67<br>(52.1-80.8)           | 75<br>(60.8-84.7)                   | <.001   |
| Men                                       | 1,705 (44.7)              | 1,501 (43.9)                | 204 (51.9)                          | .003    |
| White                                     | 3,492 (91.5)              | 3,133 (91.5)                | 359 (91.4)                          | .98     |
| Medical unit                              | 2,345 (61.4)              | 2,034 (59.4)                | 311 (79.1)                          | <.001   |
| Length of stay, d                         | 3.9 (4.0)                 | 3.6 (3.4)                   | 6.4 (6.8)                           | <.001   |
| No. of rehospitalizations in 1 year       | 1.4 (0.9)                 | 1.4 (0.9)                   | 1.7 (1.3)                           | <.001   |
| BMI, kg/m <sup>2</sup>                    | 30 (8)                    | 30 (8)                      | 30 (9)                              | .80     |
| <b>Baseline kidney function</b>           |                           |                             |                                     |         |
| Creatinine, mg/dL                         | 1.0 (0.4)                 | 1.0 (0.4)                   | 1.3 (0.8)                           | <.001   |
| Estimated GFR, mL/min/1.73 m <sup>2</sup> | 76.3 (27.2)               | 78.1 (26.5)                 | 61.2 (28.4)                         | <.001   |
| CKD 3 or worse                            | 1,082 (28.4)              | 879 (25.7)                  | 203 (51.7)                          | <.001   |
| <b>Comorbid conditions</b>                |                           |                             |                                     |         |
| Charlson score (without age)              | 2.5 (3.0)                 | 2.3 (2.9)                   | 4.2 (3.6)                           | <.001   |
| Charlson score (with age)                 | 4.8 (3.8)                 | 4.5 (3.7)                   | 7.0 (4.2)                           | <.001   |
| Coronary artery disease                   | 311 (8.1)                 | 262 (7.7)                   | 49 (12.5)                           | .001    |
| Heart failure                             | 504 (13.2)                | 409 (11.9)                  | 95 (24.2)                           | <.001   |
| Peripheral vascular disease               | 847 (22.2)                | 705 (20.6)                  | 142 (36.1)                          | <.001   |
| Cerebrovascular disease                   | 734 (19.2)                | 620 (18.1)                  | 114 (29.0)                          | <.001   |

|                                         |              |              |            |       |
|-----------------------------------------|--------------|--------------|------------|-------|
| Dementia                                | 97 (2.5)     | 86 (2.5)     | 11 (2.8)   | .90   |
| Chronic pulmonary disease               | 974 (25.5)   | 832 (24.3)   | 142 (36.1) | <.001 |
| Rheumatic disease                       | 98 (2.6)     | 87 (2.5)     | 11 (2.7)   | .90   |
| Peptic ulcer disease                    | 207 (5.4)    | 176 (5.2)    | 31 (7.9)   | .03   |
| Mild liver disease                      | 585 (15.3)   | 511 (14.9)   | 74 (18.8)  | .05   |
| Diabetes mellitus without complications | 394 (10.3)   | 321 (9.3)    | 73 (18.6)  | <.001 |
| Diabetes mellitus with complications    | 380 (9.9)    | 291 (8.5)    | 89 (22.6)  | <.001 |
| Hemiplegia or paraplegia                | 182 (4.8)    | 156 (4.6)    | 26 (6.6)   | .09   |
| Renal disease                           | 624 (16.4)   | 490 (14.3)   | 134 (34.1) | <.001 |
| Cancer                                  | 556 (14.6)   | 477 (13.9)   | 79 (20.1)  | .001  |
| Moderate-severe liver disease           | 55 (1.4)     | 39 (1.3)     | 16 (4.1)   | <.001 |
| Metastatic cancer                       | 192 (5.0)    | 158 (4.6)    | 34 (8.7)   | <.001 |
| HIV/AIDS                                | 0 (0)        | 0 (0)        | 0 (0)      | >.99  |
| Hypertension, uncomplicated             | 2,381 (62.4) | 2,069 (60.4) | 312 (79.4) | <.001 |
| Hypertension, complicated               | 497 (13.0)   | 382 (11.2)   | 115 (29.7) | <.001 |
| Coagulopathy                            | 384 (10.7)   | 321 (9.4)    | 63 (16.0)  | <.001 |
| Obesity                                 | 491 (12.9)   | 425 (12.4)   | 66 (16.8)  | .02   |
| Weight loss                             | 469 (12.3)   | 408 (11.9)   | 61 (15.5)  | .05   |
| Fluid electrolyte disorders             | 1,347 (40.5) | 1,137 (38.1) | 210 (61.3) | <.001 |

Abbreviations: AIDS=acquired immunodeficiency syndrome; AKI=acute kidney injury; BMI=body mass index; CKD=chronic kidney disease; GFR=glomerular filtration rate; HIV=human immunodeficiency virus.

<sup>a</sup> Values are median (interquartile range), No. of patients (%), or mean (SD).

**Supplemental Table 2. ICD-9-CM Coding Algorithms for Charlson Scores and Comorbid Conditions**

| <b>Comorbidities</b>                         | <b>Enhanced ICD-9-CM</b>                                                                                      |
|----------------------------------------------|---------------------------------------------------------------------------------------------------------------|
| <b>Myocardial infarction</b>                 | 410.x, 412.x                                                                                                  |
| <b>Congestive heart failure</b>              | 398.91, 402.01, 402.11, 402.91, 404.01, 404.03, 404.11, 404.13, 404.91, 404.93, 425.4-425.9, 428.x            |
| <b>Peripheral vascular disease</b>           | 093.0, 437.3, 440.x, 441.x, 443.1-443.9, 47.1, 557.1, 557.9, V43.4                                            |
| <b>Cerebrovascular disease</b>               | 362.34, 430.x-438.x                                                                                           |
| <b>Dementia</b>                              | 290.x, 294.1, 331.2                                                                                           |
| <b>Chronic pulmonary disease</b>             | 416.8, 416.9, 490.x-505.x, 506.4, 508.1, 508.8                                                                |
| <b>Rheumatic disease</b>                     | 446.5, 710.0-710.4, 714.0-714.2, 714.8, 725.x                                                                 |
| <b>Peptic ulcer disease</b>                  | 531.x-534.x                                                                                                   |
| <b>Mild liver disease</b>                    | 070.22, 070.23, 070.32, 070.33, 070.44, 070.54, 070.6, 070.9, 570.x, 571.x, 573.3, 573.4, 573.8, 573.9, V42.7 |
| <b>Diabetes without chronic complication</b> | 250.0-250.3, 250.8, 250.9                                                                                     |
| <b>Diabetes with chronic complication</b>    | 250.4-250.7                                                                                                   |
| <b>Hemiplegia or paraplegia</b>              | 334.1, 342.x, 343.x, 344.0-344.6, 344.9                                                                       |
| <b>Renal disease</b>                         | 403.01, 403.11, 403.91, 404.02, 404.03, 404.12, 404.13, 404.92, 404.93, 582.x,                                |

|                                                                                         |                                                          |
|-----------------------------------------------------------------------------------------|----------------------------------------------------------|
|                                                                                         | 583.0-583.7, 585.x, 586.x, 588.0, V42.0,<br>V45.1, V56.x |
| <b>Any malignancy, including<br/>lymphoma and leukemia, except<br/>neoplasm of skin</b> | 140.x-172.x, 174.x-195.8, 200.x-208.x, 238.6             |
| <b>Moderate or severe liver disease</b>                                                 | 456.0-456.2, 572.2-572.8                                 |
| <b>Metastatic solid tumor</b>                                                           | 196.x-199.x                                              |
| <b>AIDS/HIV</b>                                                                         | 042.x-044.x                                              |

Data from *Med Care*.<sup>27</sup>

**Supplemental Table 3.** Comorbid Conditions Associated With Hospital-Acquired Acute Kidney Injury at Any Stage (Univariate Logistic Regression)

| <b>Feature</b>                                    | <b>Coefficient <sup>a</sup></b> | <b>Odds Ratio (95%<br/>CI)</b> | <b>P Value</b> |
|---------------------------------------------------|---------------------------------|--------------------------------|----------------|
| <b>Hypertension</b>                               | 0.97                            | 2.65 (2.06-3.45)               | <.001          |
| <b>Medical Unit</b>                               | 0.95                            | 2.59 (2.02-3.35)               | <.001          |
| <b>Renal Disease</b>                              | 0.95                            | 2.58 (2.08-3.20)               | <.001          |
| <b>Diabetes Mellitus</b>                          | 0.95                            | 2.57 (2.00-3.28)               | <.001          |
| <b>Heart Failure</b>                              | 0.85                            | 2.35 (1.82-3.02)               | <.001          |
| <b>Vascular Disease</b>                           | 0.80                            | 2.23 (1.81-1.76)               | <.001          |
| <b>Coagulopathy</b>                               | 0.61                            | 1.84 (1.37-2.46)               | <.001          |
| <b>Pulmonary Disease</b>                          | 0.57                            | 1.76 (1.41-2.19)               | <.001          |
| <b>Coronary Artery Disease</b>                    | 0.54                            | 1.72 (1.23-2.36)               | .001           |
| <b>Cancer</b>                                     | 0.46                            | 1.58 (1.22-2.04)               | <.001          |
| <b>Obesity</b>                                    | 0.35                            | 1.42 (1.06-1.88)               | .02            |
| <b>Male Gender</b>                                | 0.32                            | 1.38 (1.12-1.70)               | .002           |
| <b>Liver Disease</b>                              | 0.32                            | 1.37 (1.04-1.78)               | .02            |
| <b>Weight Loss</b>                                | 0.31                            | 1.36 (1.00-1.80)               | .04            |
| <b>Charlson Score (per 1-<br/>point increase)</b> | 0.17                            | 1.18 (1.15-1.22)               | <.001          |
| <b>Age (per 1-year increase)</b>                  | 0.02                            | 1.02 (1.01-1.03)               | <.001          |

<sup>a</sup> Coefficient estimate for the model.

**Supplemental Table 4.** Table based on cutoffs for 80% sensitivity and specificity in the validation cohort

| <b>Score</b>                | <b>Sensitivity<br/>(95% CI)</b> | <b>Specificity<br/>(95% CI)</b> | <b>PPV<br/>(95% CI)</b> | <b>NPV<br/>(95% CI)</b> |
|-----------------------------|---------------------------------|---------------------------------|-------------------------|-------------------------|
| <b>Low (&lt; -2.57)</b>     | 0.24 (0.20, 0.29)               | 0.38 (0.36, 0.40)               | 0.05 (0.04, 0.06)       | 0.80 (0.78, 0.83)       |
| <b>Med (-2.57 to -1.94)</b> | 0.33 (0.28, 0.38)               | 0.74 (0.72, 0.75)               | 0.13 (0.11, 0.16)       | 0.90 (0.89, 0.91)       |
| <b>High (&gt; -1.94)</b>    | 0.43 (0.38, 0.48)               | 0.88 (0.87, 0.89)               | 0.31 (0.27, 0.35)       | 0.93 (0.92, 0.94)       |

**Supplemental Table 5.** Table based on cutoffs for 90% sensitivity and specificity in the validation cohort

| <b>Score</b>                | <b>Sensitivity<br/>(95% CI)</b> | <b>Specificity<br/>(95% CI)</b> | <b>PPV<br/>(95% CI)</b> | <b>NPV<br/>(95% CI)</b> |
|-----------------------------|---------------------------------|---------------------------------|-------------------------|-------------------------|
| <b>Low (&lt; -2.93)</b>     | 0.11 (0.10, 0.12)               | 0.64 (0.62, 0.66)               | 0.03 (0.02, 0.04)       | 0.85 (0.84, 0.87)       |
| <b>Med (-2.93 to -1.63)</b> | 0.61 (0.56, 0.66)               | 0.41 (0.39, 0.43)               | 0.11 (0.10, 0.13)       | 0.90 (0.88, 0.91)       |
| <b>High (&gt;-1.63)</b>     | 0.29 (0.25, 0.34)               | 0.95 (0.94, 0.96)               | 0.41 (0.35, 0.47)       | 0.92 (0.91, 0.93)       |

## Supplemental Legends

**Supplemental Figure 1.** Box Plots Showing Number of Baseline Comorbid Conditions (Charlson Score) by Presence or Absence of Any Hospital-Acquired Acute Kidney Injury (AKI) (Development Cohort).  $P < .001$ .

**Supplemental Figure 2.** Box Plots Showing Hospital Length of Stay by Acute Kidney Injury (AKI) Stage (Development Cohort).  $P < .001$ .

**Supplemental Figure 3.** Analysis of the Final Model (Development Cohort). A, Receiver operating characteristic curve. B, Calibration graph. Observed vs expected acute kidney injury.

**Supplemental Figure 4.** Analysis of the Final Model (Validation Cohort). A, Receiver operating characteristic curve. B, Calibration graph. Observed vs expected acute kidney injury.



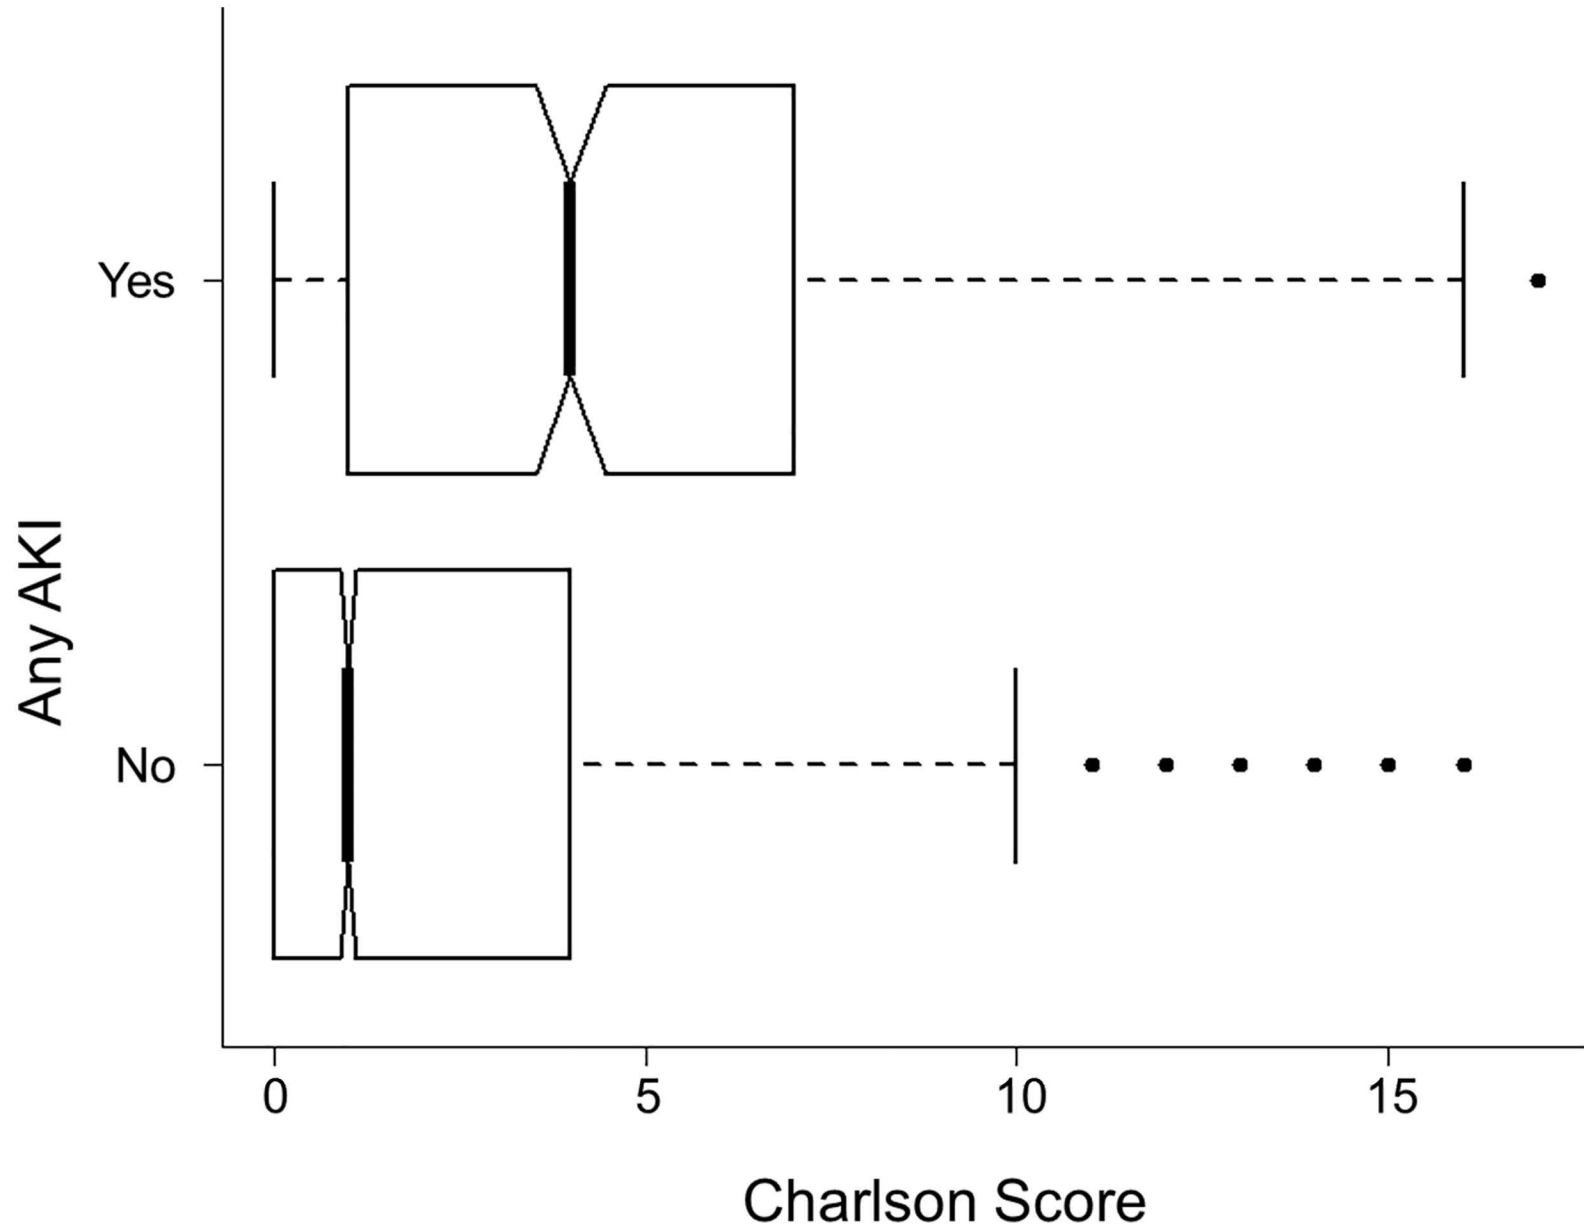

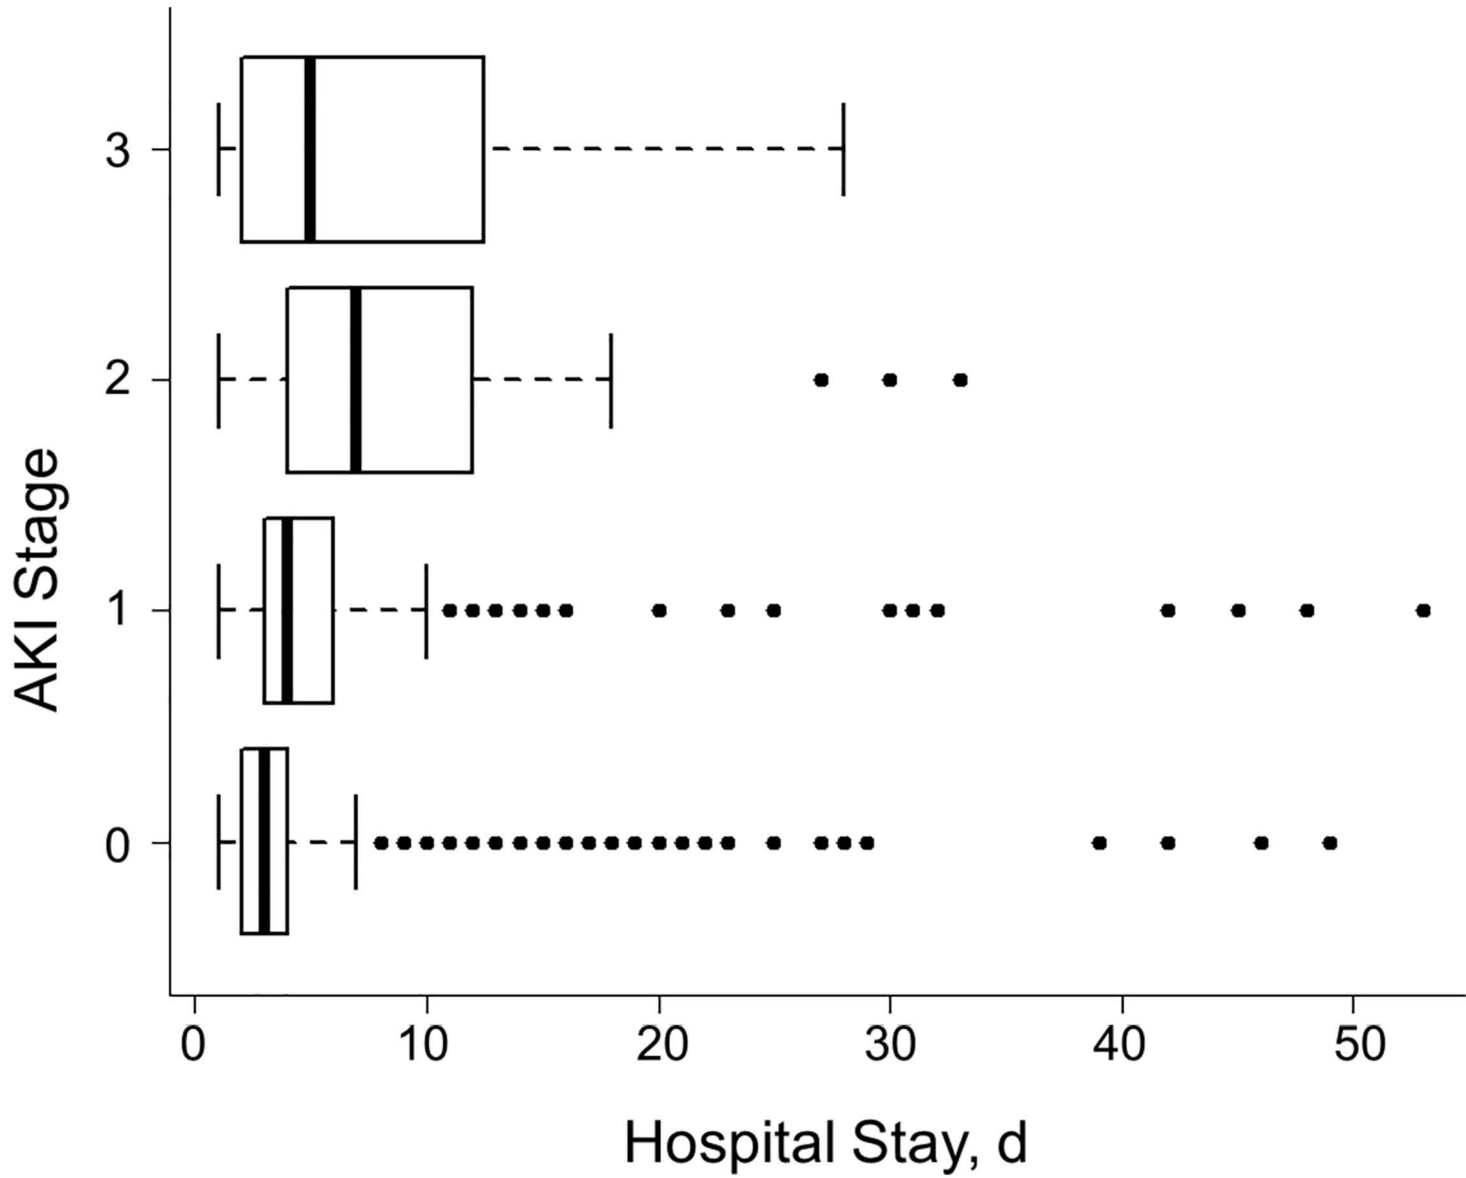

**A**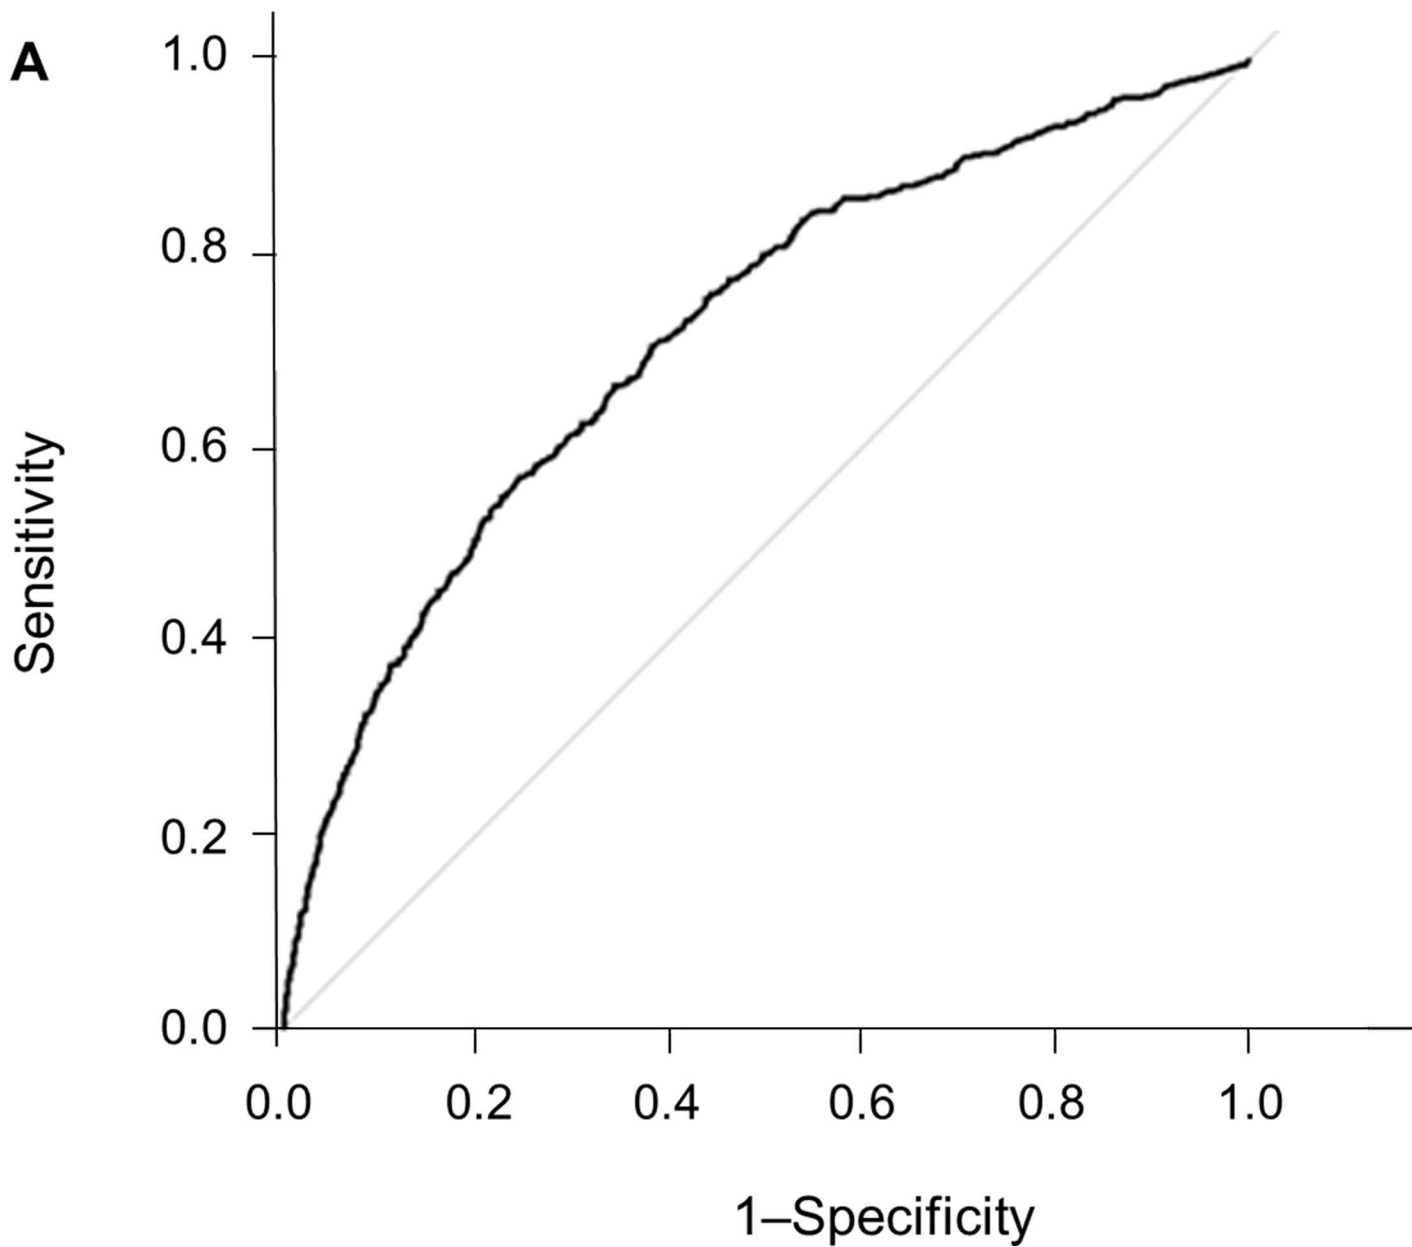

**B**

Observed

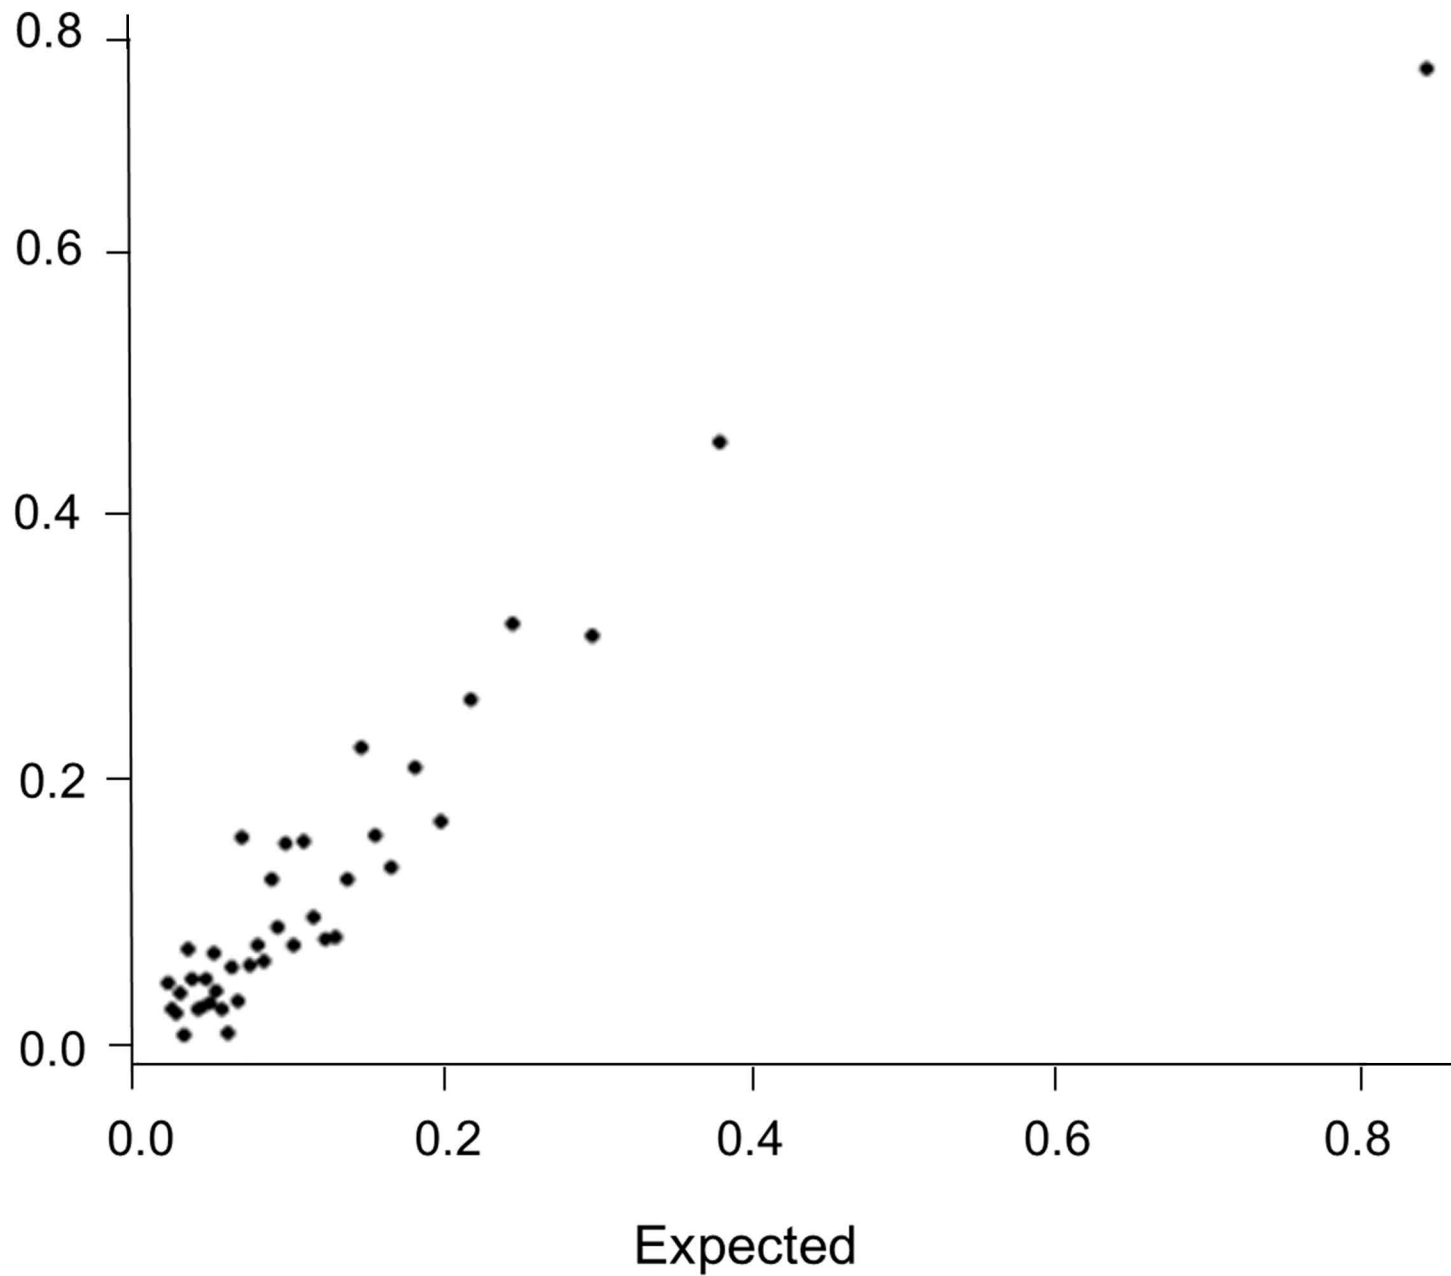

**A**

Sensitivity

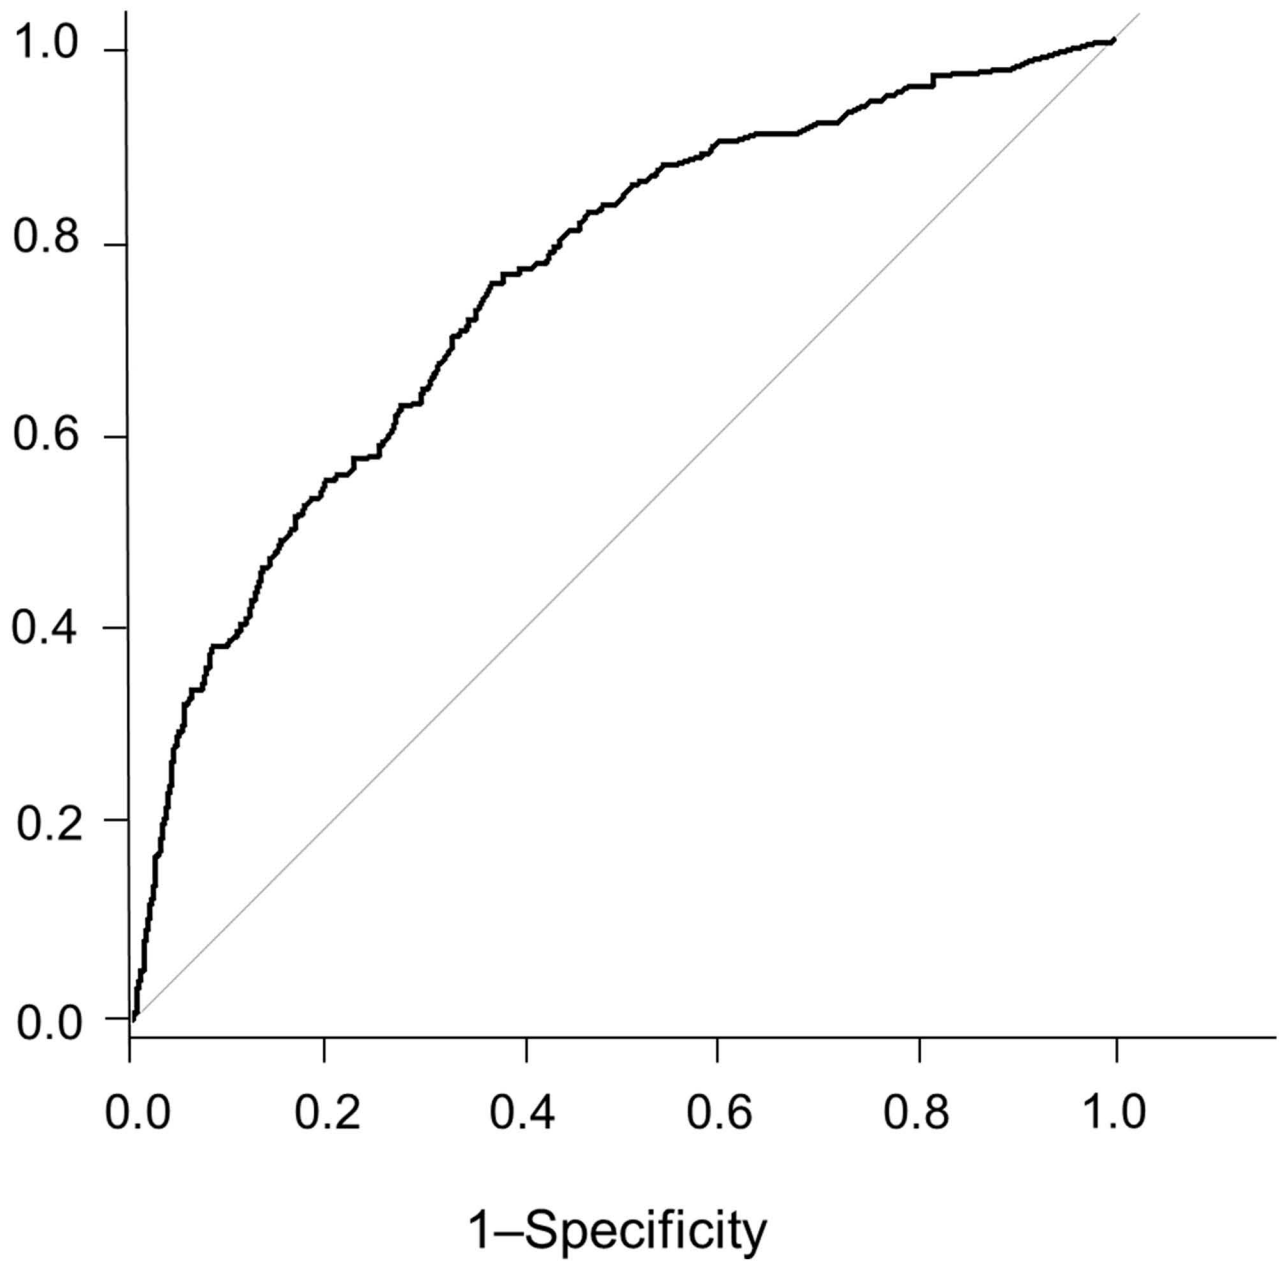

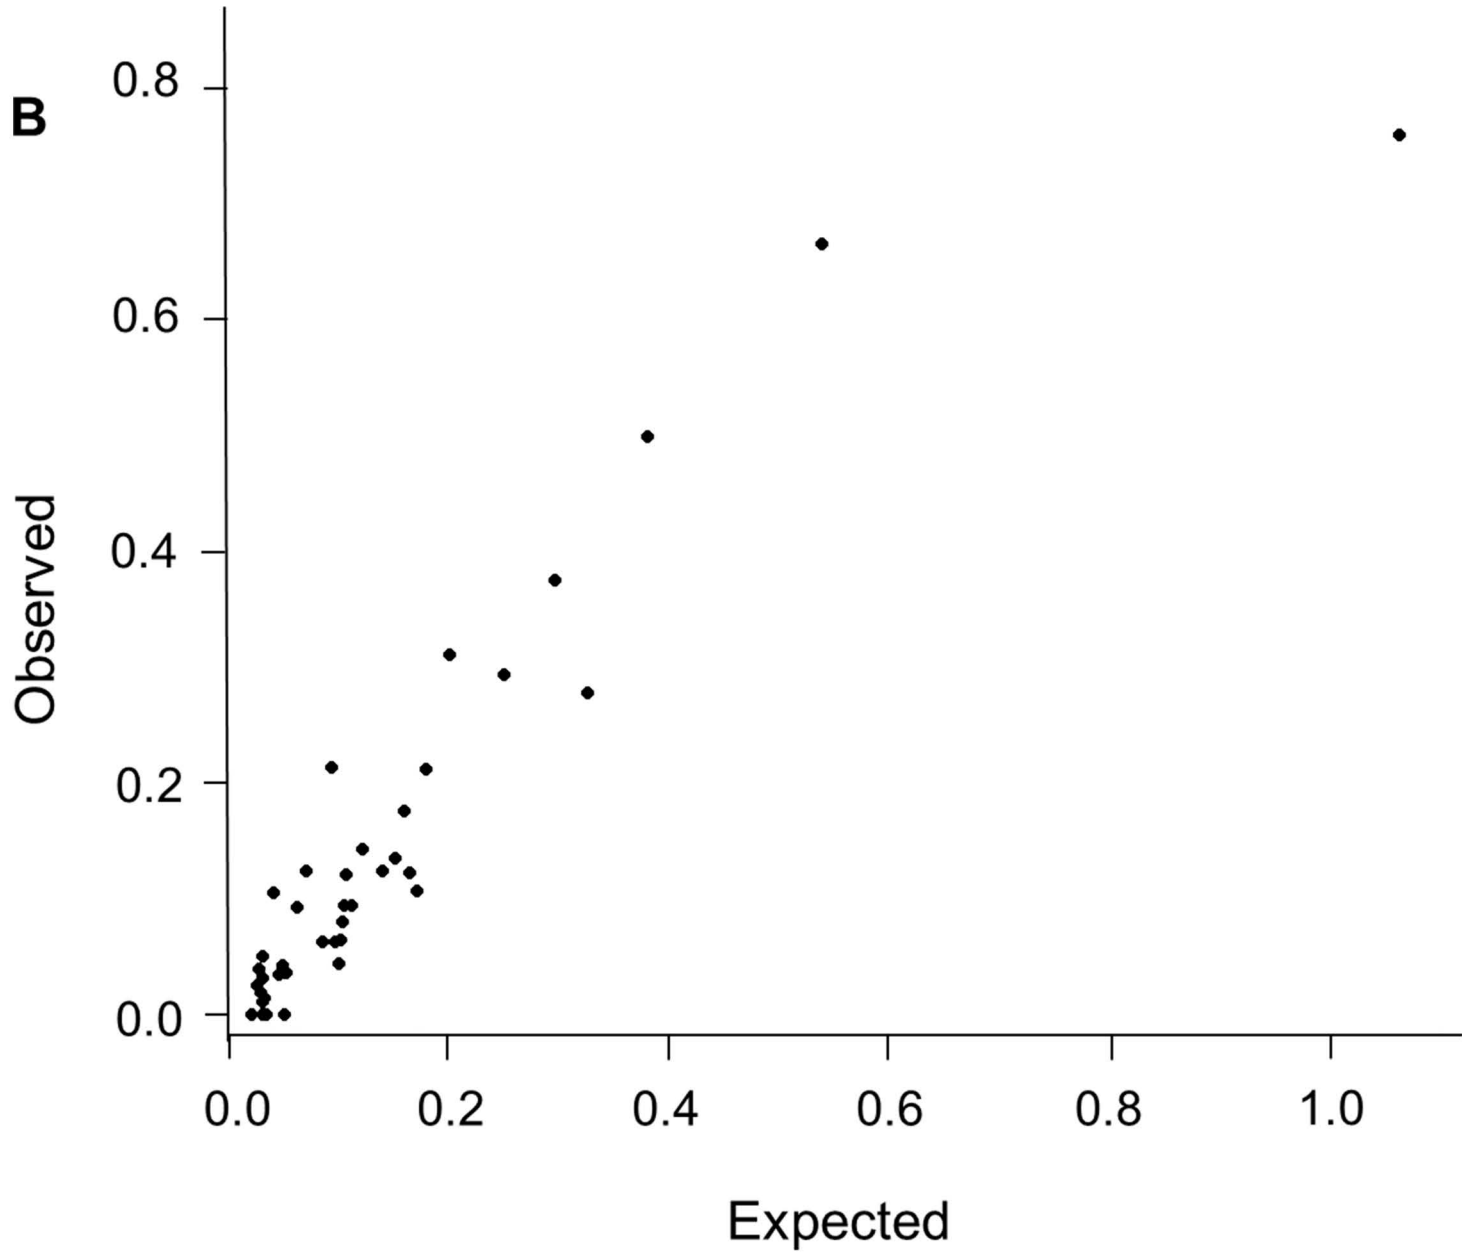

Supplement: NIHMS1054364-supplement-supplement.pdf [file NIHMS1054364-supplement-supplement.pdf]
